# Supplementary material for: Immunogenicity and safety of COVID-19 vaccine in lung cancer patients receiving anticancer treatment: A prospective multicenter cohort study
Source: PubMed Central journal article supplement — Hum Vaccin Immunother. 2022 Nov 11;18(6):2140549. doi: 10.1080/21645515.2022.2140549 (PMC9746471; doi:10.1080/21645515.2022.2140549), 2022-11-11

**Supplementary Figure 1.** Changes in the anti-RBD antibody titer shown in BAU/mL.

When converted to BAU/mL, the cutoff values for seropositivity for Architect and Elecsys are  $\geq 7.1$  AU/mL and  $\geq 0.82$  U/mL, respectively. A red triangle in each box shows the geometric mean titers, whereas the black horizontal line in the middle shows the median of the log-transformed antibody titers. A. Anti-RBD titer on Architect. B. Anti-RBD titer on Elecsys.

Anti-RBD, anti-severe respiratory syndrome coronavirus-2 receptor-binding domain spike protein IgG;

S0, within 14 days before the first vaccination; S1, within 7 days before the second vaccination; S2,  $4 \pm 1$  weeks (21–35 days) after the second vaccination;

Architect, Architect SARS-CoV-2 IgG II Quant (Abbott Laboratories); Elecsys, Elecsys Anti-SARS-CoV-2 S (Roche Diagnostics)

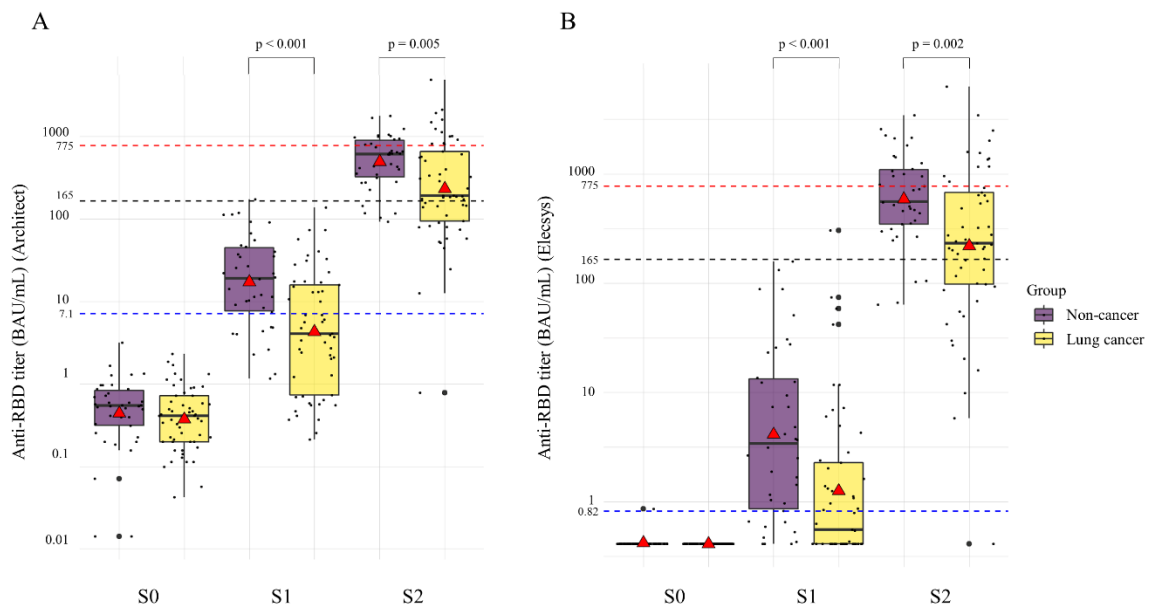

**Supplementary Figure 2.** Changes in the anti-RBD antibody titer shown in BAU/mL.

When converted to BAU/mL, the cutoff values for seropositivity for Architect and Elecsys are  $\geq 7.1$  AU/mL and  $\geq 0.82$  U/mL, respectively. A red triangle in each box shows the geometric mean titers, whereas the black horizontal line in the middle shows the median of the log-transformed antibody titers. A. Anti-RBD titer on Architect. B. Anti-RBD titer on Elecsys.

Anti-RBD, anti-severe respiratory syndrome coronavirus-2 receptor-binding domain spike protein IgG; LC, lung cancer; ICI, immune-checkpoint inhibitor; TKI, tyrosine kinase inhibitor;

S0, within 14 days before the first vaccination; S1, within 7 days before the second vaccination; S2,  $4 \pm 1$  weeks (21–35 days) after the second vaccination;

Architect, Architect SARS-CoV-2 IgG II Quant (Abbott Laboratories); Elecsys, Elecsys Anti-SARS-CoV-2 S (Roche Diagnostics)

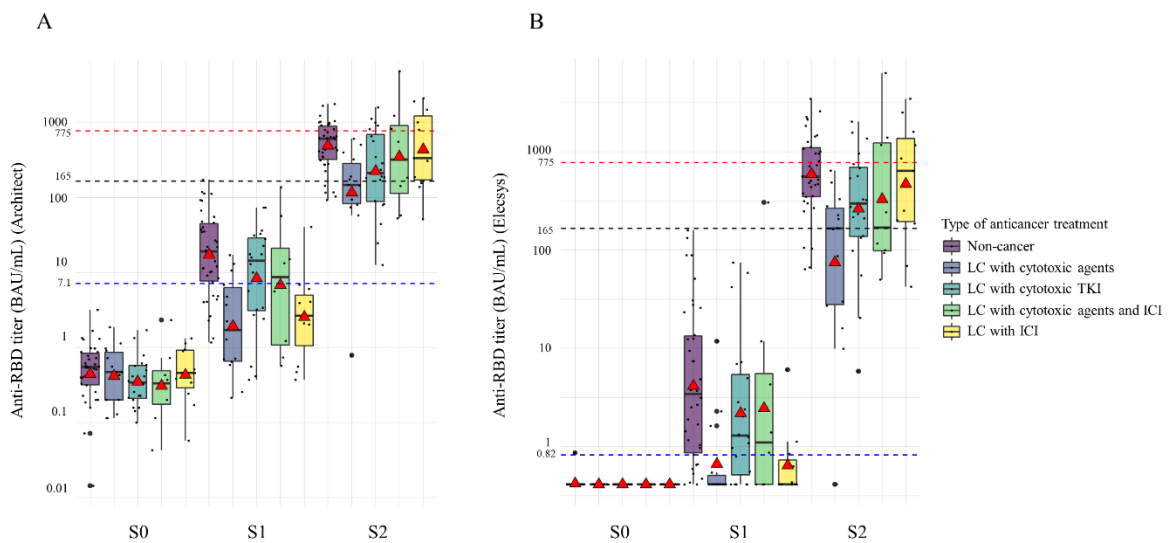

Supplement: KHVI_A_2140549_SM5207.pdf [file KHVI_A_2140549_SM5207.pdf]
